# Supplementary material for: Insights into colistin-mediated fluorescence labelling of bacterial LPS
Source: Royal Society of Chemistry journal article supplement (doi:10.1039/d3ra07107c), 2024-01-01
Supplement: d3ra07107c1.pdf [file d3ra07107c1.pdf]

## SUPPORTING INFORMATION

### **Insights into Colistin-mediated fluorescence labelling of bacterial LPS**

Saurodeep Mandal<sup>a</sup>, Dipanwita Patra<sup>b</sup>, Sukhendu Mandal<sup>b</sup>, Gourab Kanti Das<sup>a</sup>, and Prithidipa Sahoo\*<sup>a</sup>

<sup>a</sup>Department of Chemistry, Visva-Bharati, Santiniketan-731235, West Bengal, India.

<sup>b</sup>Department of Microbiology, University of Calcutta, Kolkata-700019, India.

## Contents

|                                                                                       |     |
|---------------------------------------------------------------------------------------|-----|
| 1. Absorption and Emission spectra of LPS.....                                        | S3  |
| 2. UV titration spectra of NAF with Colistin and LPS mixture.....                     | S4  |
| 3. Fluorescence titration spectra of NAF with Colistin and LPS mixture.....           | S5  |
| 4. Quantitative fluorescence response.....                                            | S6  |
| 5. Lipid A domain of LPS Structure.....                                               | S6  |
| 6. Fluorescence Microscopy in Colistin sensitive <i>E. coli</i> .....                 | S7  |
| 7. Antibiotic sensitivity experiment with colistin-sensitive <i>S.typhi</i> .....     | S7  |
| 8. Energy minimised LPS 3d Structure.....                                             | S10 |
| 9. Iso Surface of computationally predicted and simulated structure of LPS..          | S11 |
| 10. Binding interaction of Colistin with LPS.....                                     | S12 |
| 11. Energy minimisation (MD) and Potential energy diagram.....                        | S13 |
| 12. Electrostatic potential (MK charge) and Natural bond orbital<br>calculations..... | S14 |

## 1. Absorption and Emission spectra of LPS

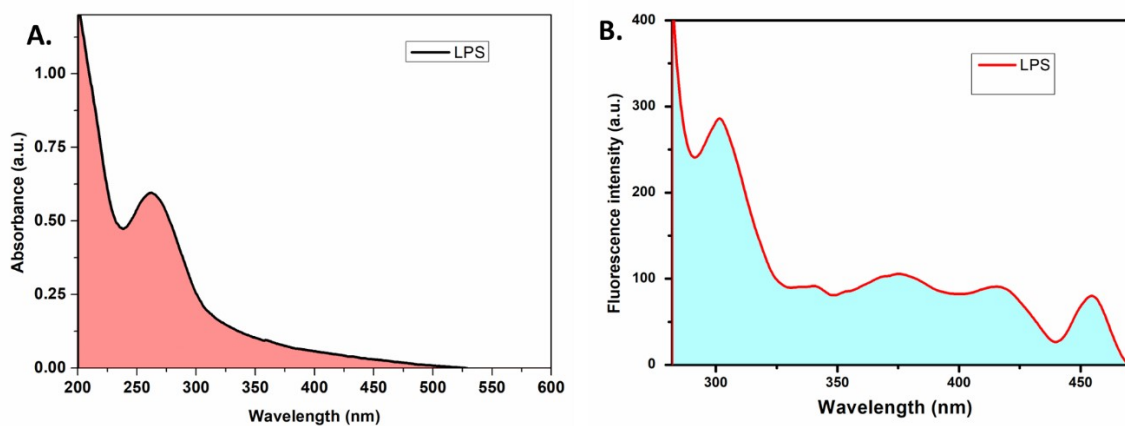

**Figure S1.** A. Absorption spectra of LPS, B. Emission spectra of LPS upon excitation at 262 nm. LPS (1.718 mg/mL stock solution) has been utilised.

## 2. UV titration spectra of NAF with Colistin and LPS mixture

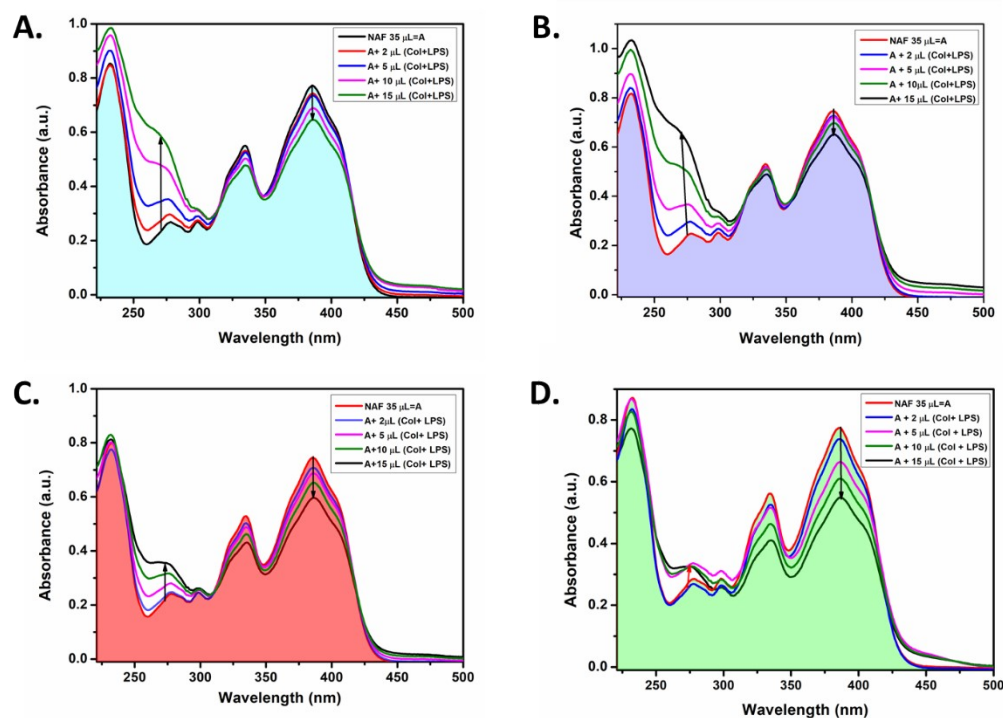

**Figure S2.** Behavioural change in absorbance bands of NAF upon interaction with colistin-LPS by different ratiometric mixture (v/v) A. colistin: LPS = 1:2, B. colistin: LPS = 1:3, C. colistin: LPS = 2:1, and D. colistin: LPS = 3:1 where NAF (0.017 mg/mL stock solution) , colistin (0.21 mg/ml stock solution) and LPS (1.718 mg/mL stock solution ) have been utilised.

### 3. Fluorescence titration spectra of NAF with Colistin and LPS mixture

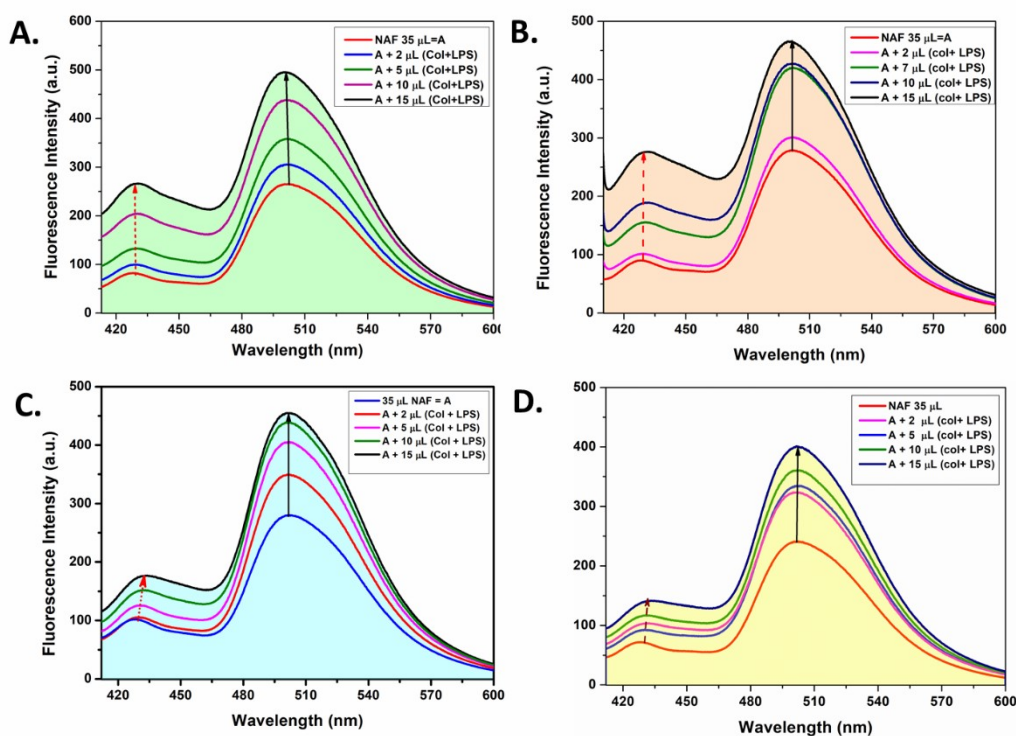

**Figure S3.** Behavioural change in fluorescence spectra of NAF upon interaction with colistin-LPS by different ratiometric mixture (v/v) A. colistin: LPS = 1:2, B. colistin: LPS = 1:3, C. colistin: LPS = 2:1 and colistin: LPS = 3:1 ( $\lambda_{\text{ex}} = 384 \text{ nm}$ ) where NAF (0.017 mg/mL stock solution), colistin (0.21 mg/mL stock solution) and LPS (1.718 mg/mL stock solution) have been utilised.

## 4. Quantitative fluorescence response

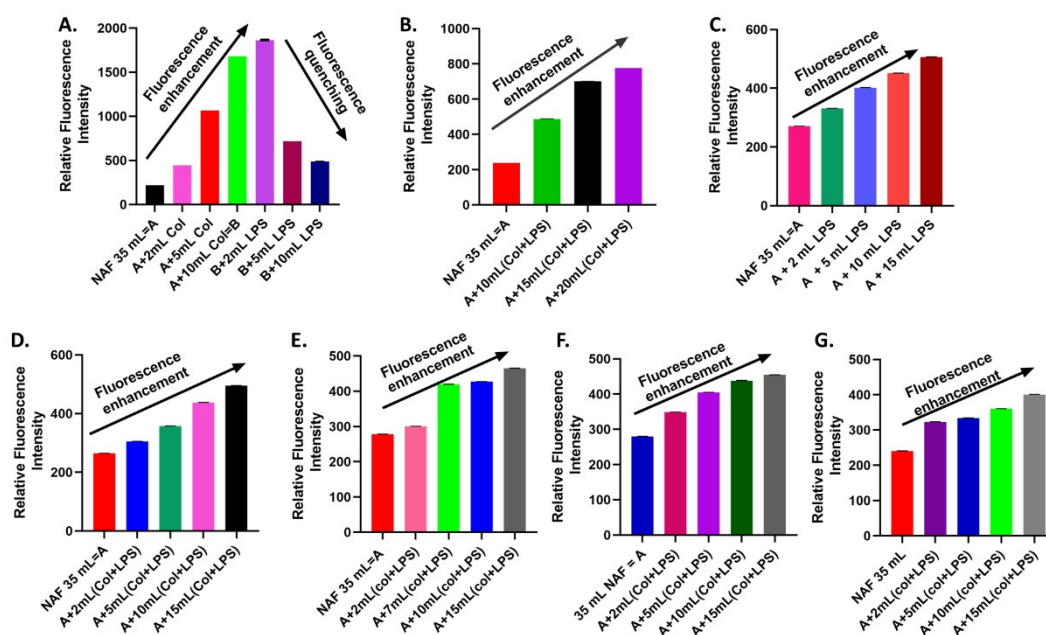

**Figure S4.** Quantitative fluorescence analysis **A.** NAF (0.017 mg/mL stock) with the sequential addition of colistin (0.21 mg/ml stock) and LPS (1.718 mg/mL), **B.** NAF with simultaneous addition of colistin and LPS (1:1 v/v), **C.** NAF with LPS, NAF upon interaction with colistin-LPS by different ratiometric mixture (v/v) **D.** colistin: LPS = 1:2, **E.** colistin: LPS = 1:3, **F.** colistin: LPS = 2:1, **G.** colistin: LPS = 3:1 ( $I_{ex}$  = 384 nm) where NAF (0.017 mg/mL stock solution), colistin (0.21 mg/ml stock solution) and LPS (1.718 mg/mL stock solution) have been utilised.

## 5. Lipid A domain of LPS Structure

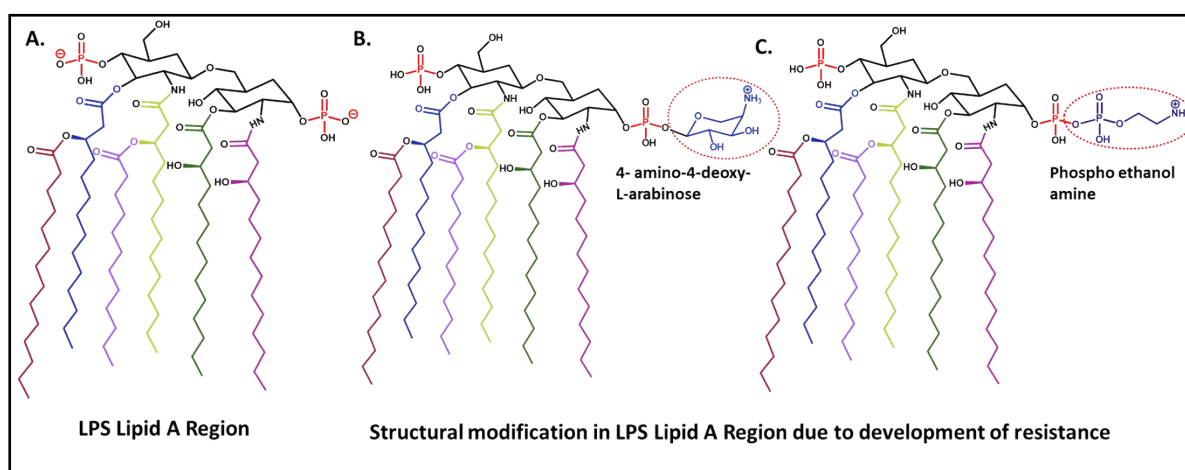

**Figure S5.** Lipid A region of LPS structure along with their modification in structure due to resistance.

## 6. Fluorescence Microscopy in Colistin sensitive *E. coli*

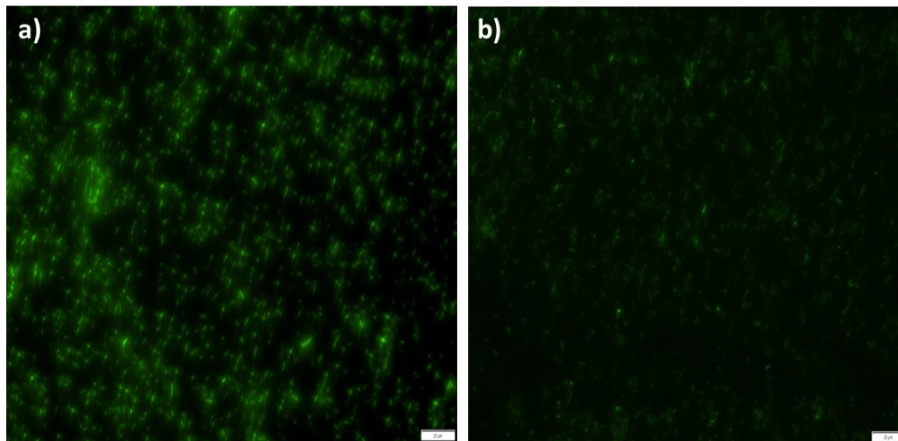

**Figure S6.** Fluorescence microscopic images of *E. coli* a) FITC filter at 40X. NAF then Colistin  
b) FITC filter at 40X. Colistin and NAF simultaneous

## 7. Antibiotic sensitivity Experiment with colistin sensitive *S. typhi*

### A. Antibiotic sensitivity of colistin against *S. typhi*

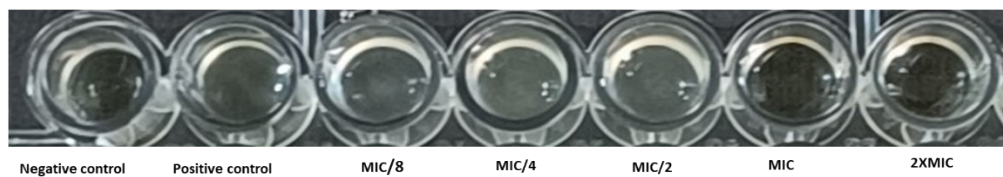

### B. Antibiotic sensitivity of colistin + NAF (1:1) against *S. typhi*

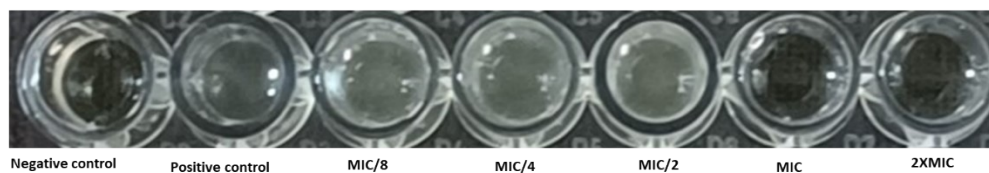

**Figure S7.** Antibiotic sensitivity well plate experiment

### Determination of Minimal Inhibitory Concentration (MIC):

The Minimal Inhibitory Concentration (MIC) was determined in a 96-well microplate using the microdilution method in the Mueller-Hinton broth (Himedia) medium. *Salmonella typhi* ( $5 \times 10^5$  CFU/mL) was added to the broth containing different concentrations of colistin and colistin + NAF and then incubated overnight at 37°C. After that, the optical density (OD) was measured using a microplate reader at 600nm. The MIC was determined to be the lowest concentration of antibiotic capable of inhibiting the growth of bacteria.

**Table S1: optical density in antibiotic sensitivity assay**

|                  | Colistin |      |      | Colistin + NAF |      |      |
|------------------|----------|------|------|----------------|------|------|
| Negative control | 0.05     | 0.05 | 0.05 | 0.05           | 0.05 | 0.05 |
| Positive control | 0.57     | 0.52 | 0.49 | 0.49           | 0.54 | 0.49 |
| MIC/8            | 0.51     | 0.49 | 0.57 | 0.49           | 0.60 | 0.49 |
| MIC/4            | 0.49     | 0.44 | 0.46 | 0.51           | 0.49 | 0.50 |
| MIC/2            | 0.33     | 0.35 | 0.39 | 0.35           | 0.38 | 0.39 |
| MIC              | 0.05     | 0.05 | 0.05 | 0.05           | 0.05 | 0.05 |
| 2XMIC            | 0.05     | 0.05 | 0.05 | 0.05           | 0.05 | 0.05 |

Optical density (O.D) at 600nm. The above table shows the optical density in antibiotic sensitivity assay. Colistin and colistin + NAF shows same MIC value against *S. typhi*.

Colistin shows MIC at 4µg/ml, and colistin + NAF(1:1) also shows MIC at 4µg/ml. Thus, from the results of the above experiment, it can be concluded that NAF does not alter the antimicrobial activity of colistin against *S. typhi*.



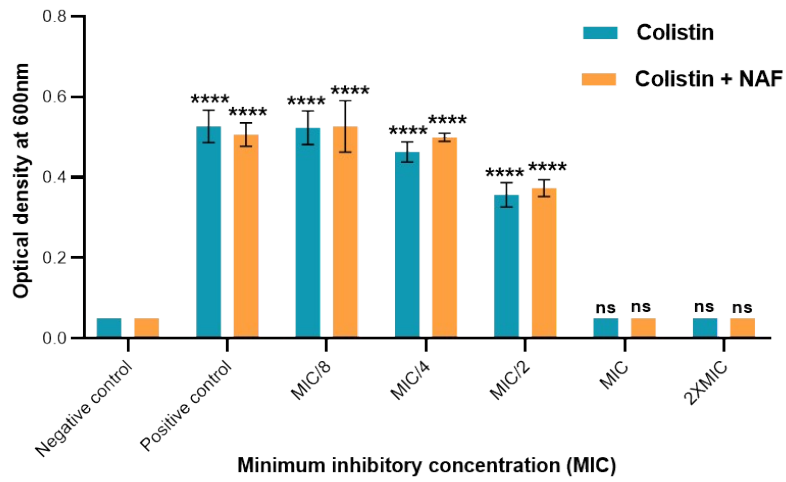

**Figure S8.** Statistical analysis of optical density data obtained for MIC calculation different \*sign [ $P = <0.0001$  (\*\*\*\*),  $P = <0.001$  (\*\*\*),  $P = <0.01$  (\*\*),  $P = <0.1$  (\*)] indicates significant difference and ns means not significant by Sidak's multiple comparisons test.

## 8. Energy minimized LPS 3d Structure

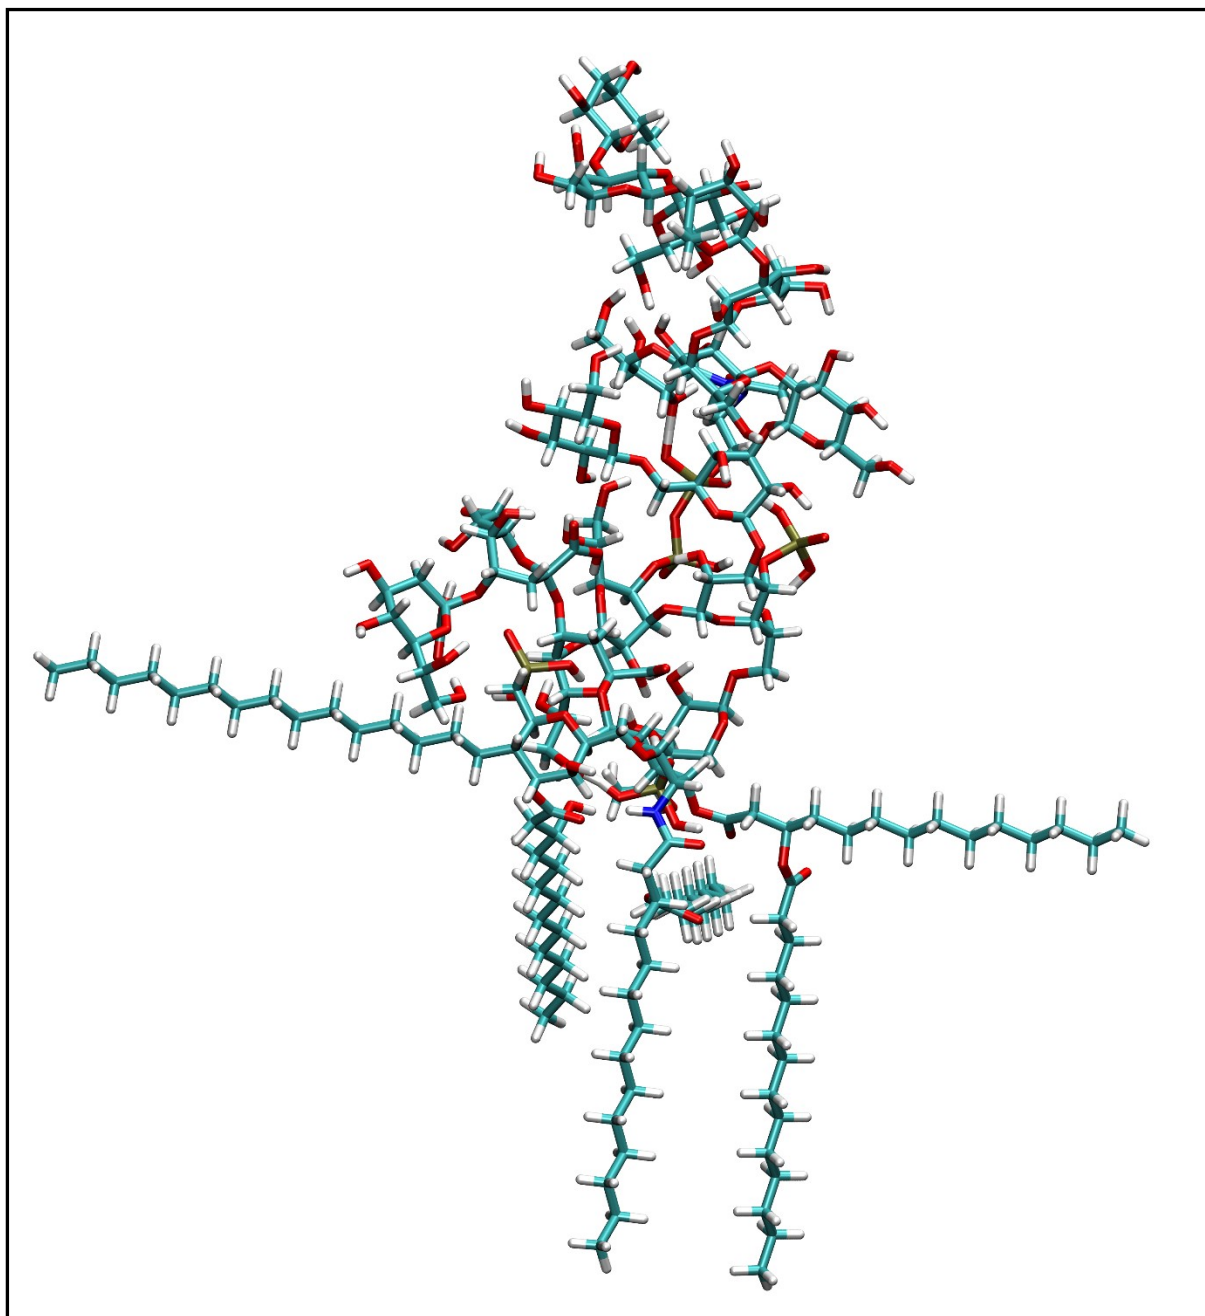

**Figure S9.** Computationally predicted and simulated the three-dimensional structure of LPS, Optimisation was done by implementing DFT, b3lyp/6-31g level of theory, CPCM solvent model, water as solvent

## 9. Iso Surface generated from the LPS 3d structure

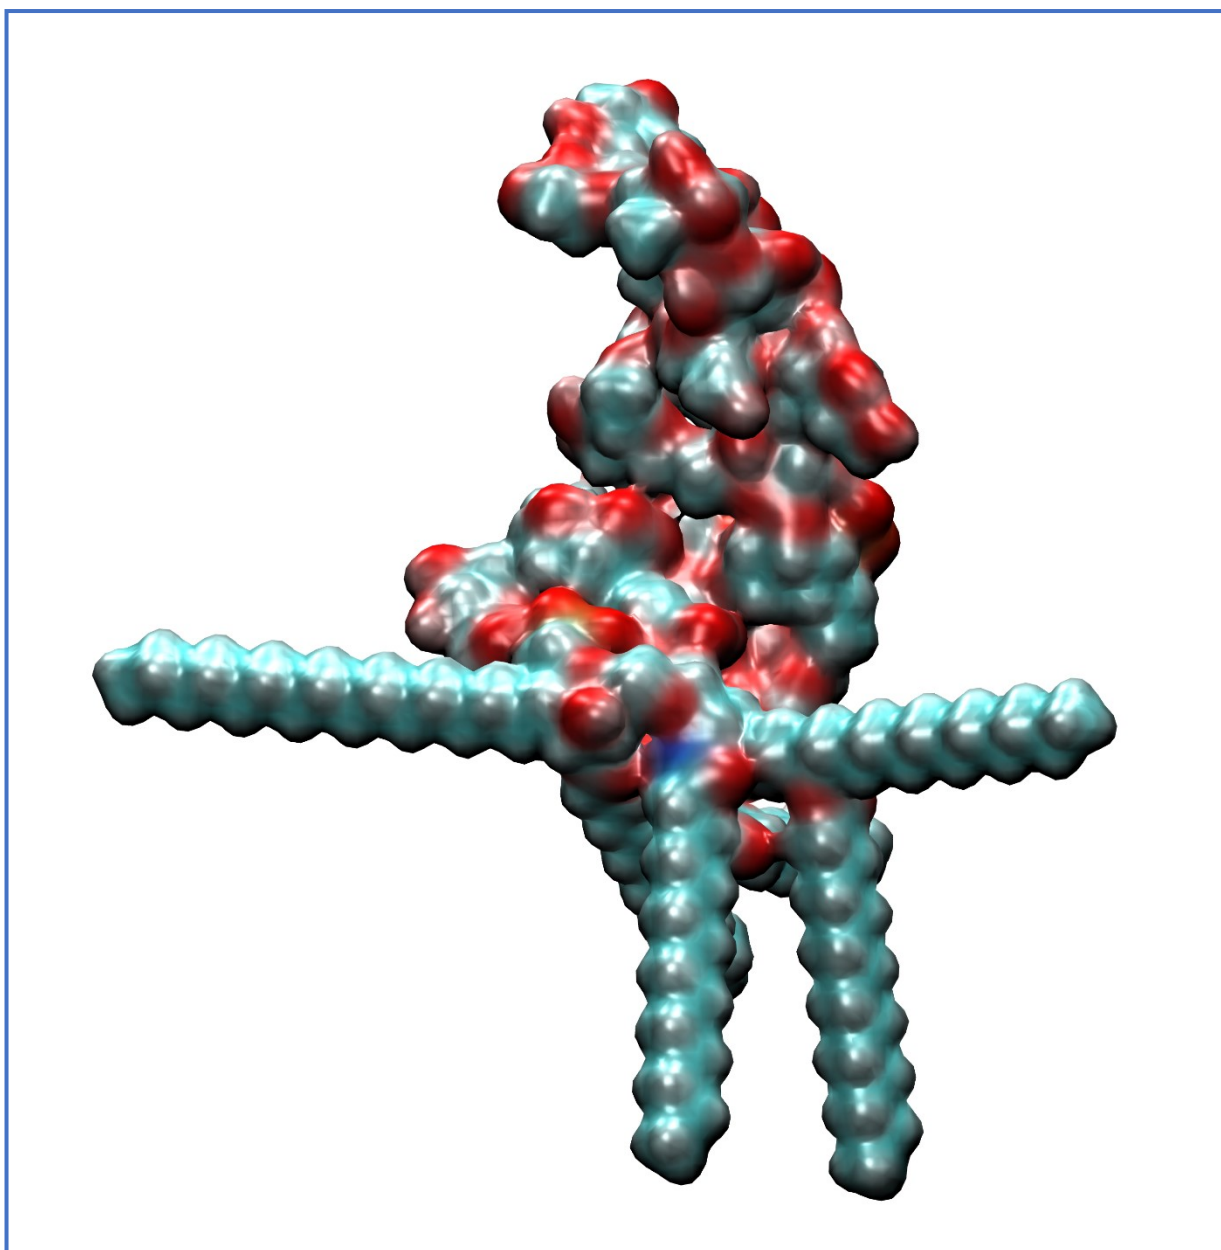

**Figure S10.** Iso Surface of computationally predicted and simulated structure of LPS.

## 10. Binding interaction of Colistin with LPS

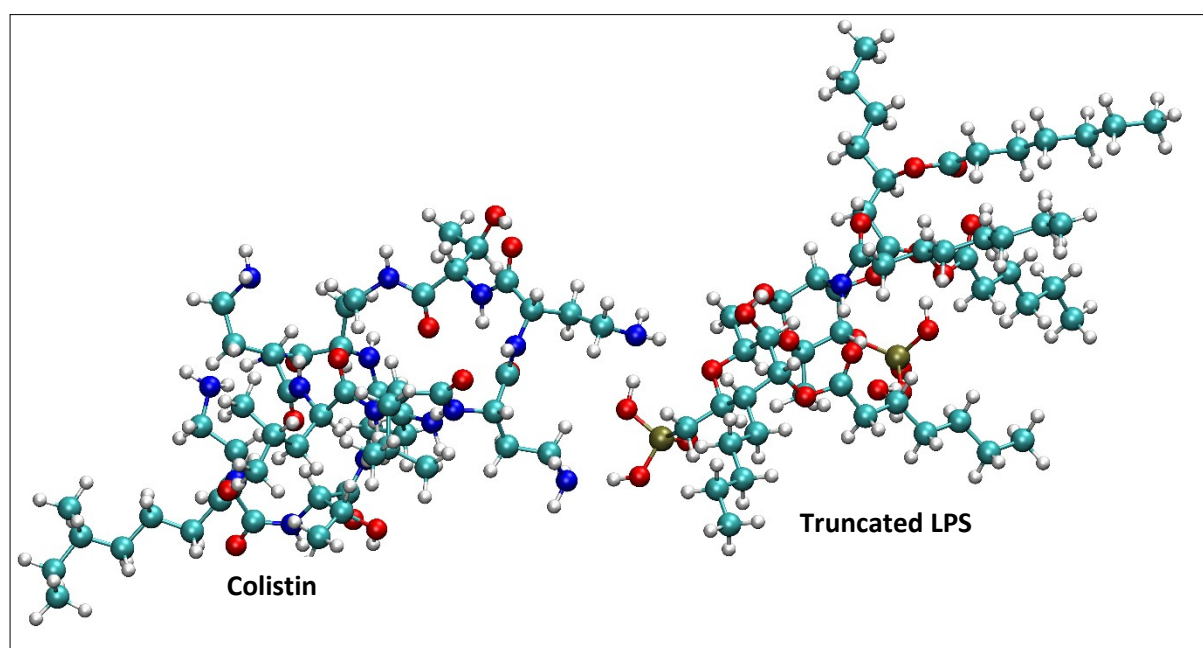

**Figure S11.** Energy minimised structure of Colistin interacts with truncated of LPS

## 11. Energy minimisation (MD) and Potential energy diagram

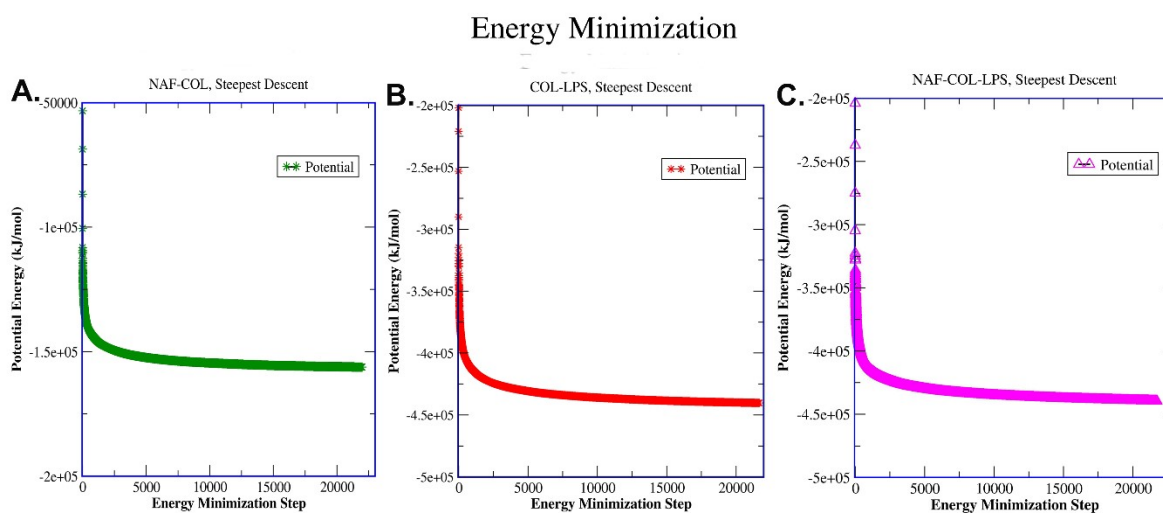

**Figure S12.** Potential energy diagram of A. NAF-colistin B. colistin-LPS C. NAF-colistin-LPS obtained from MD simulation (energy minimisation)

## 12. Electrostatic potential (MK charge) and Natural bond orbital calculations

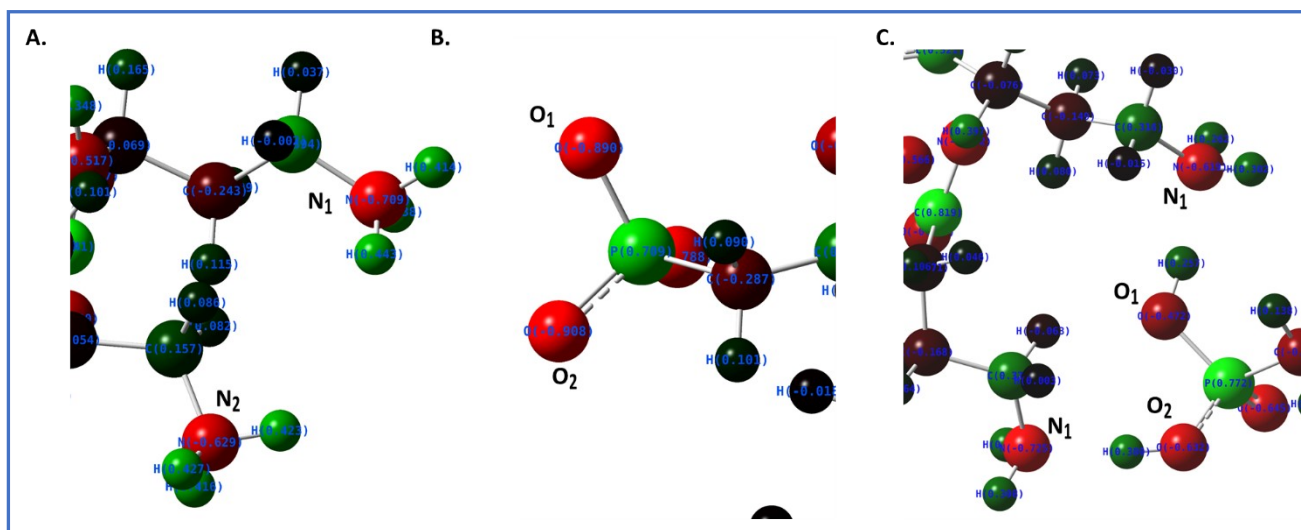

**Figure S13.** ESP charge analysis (Merz-Kollman charge) of A. Colistin (before interaction with LPS), B. LPS (before interaction with colistin) C. Colistin-LPS conjugate (after interaction)

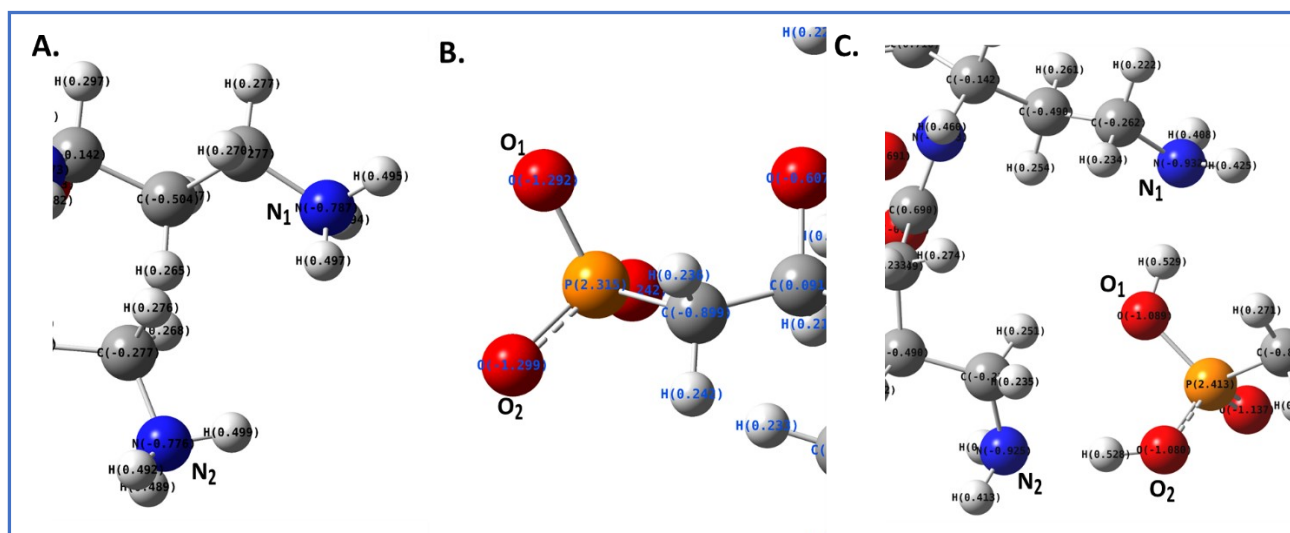

**Figure S14.** NBO charge analysis of A. Colistin (before interaction with LPS), B. LPS (before interaction with colistin) C. Colistin-LPS conjugate (after interaction)
